# Supplementary material for: Genetic Characteristics of Methicillin-Resistant Staphylococcus argenteus Isolates Collected in the Dutch National MRSA Surveillance from 2008 to 2021
Source: PubMed Central journal article supplement (PMC9603934; doi:10.1128/spectrum.01035-22), 2022-08-25
Supplement: spectrum.01035-22-s0001.pdf [file spectrum.01035-22-s0001.pdf]

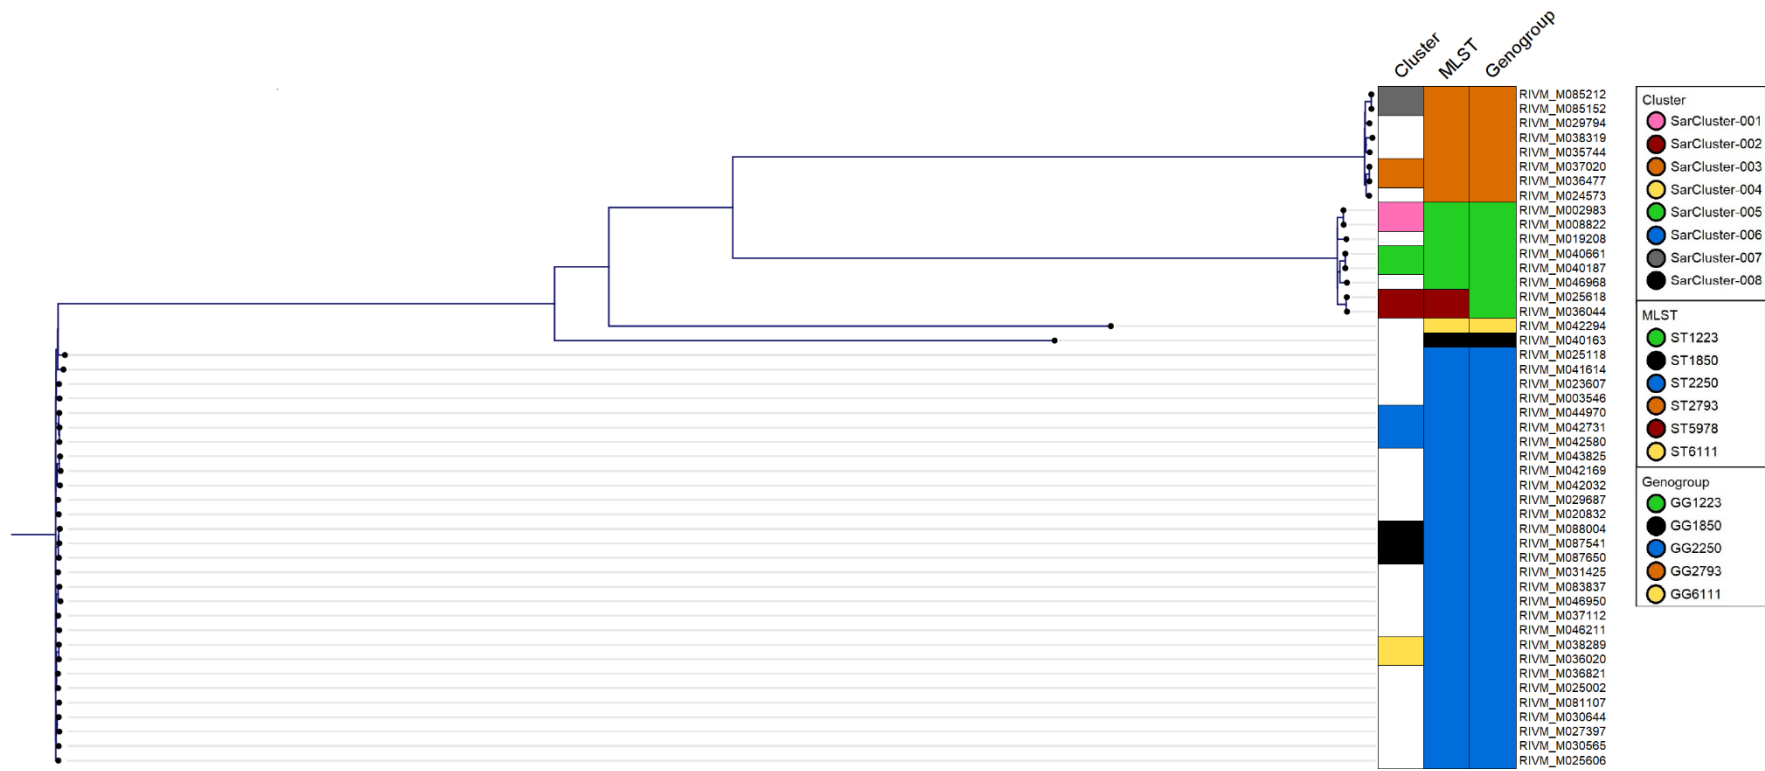

Supplemental material Figure 1. Single nucleotide polymorphism (SNP) analysis on the 47 unique Dutch *S. argenteus* isolates.
